# Supplementary figures and images for: Differential Proteomics Based on TMT and PRM Reveal the Resistance Response of Bambusa pervariabilis × Dendrocalamopisis grandis Induced by AP-Toxin
Source: MDPI journal article supplement (doi:10.3390/metabo9080166), 2019-08-10

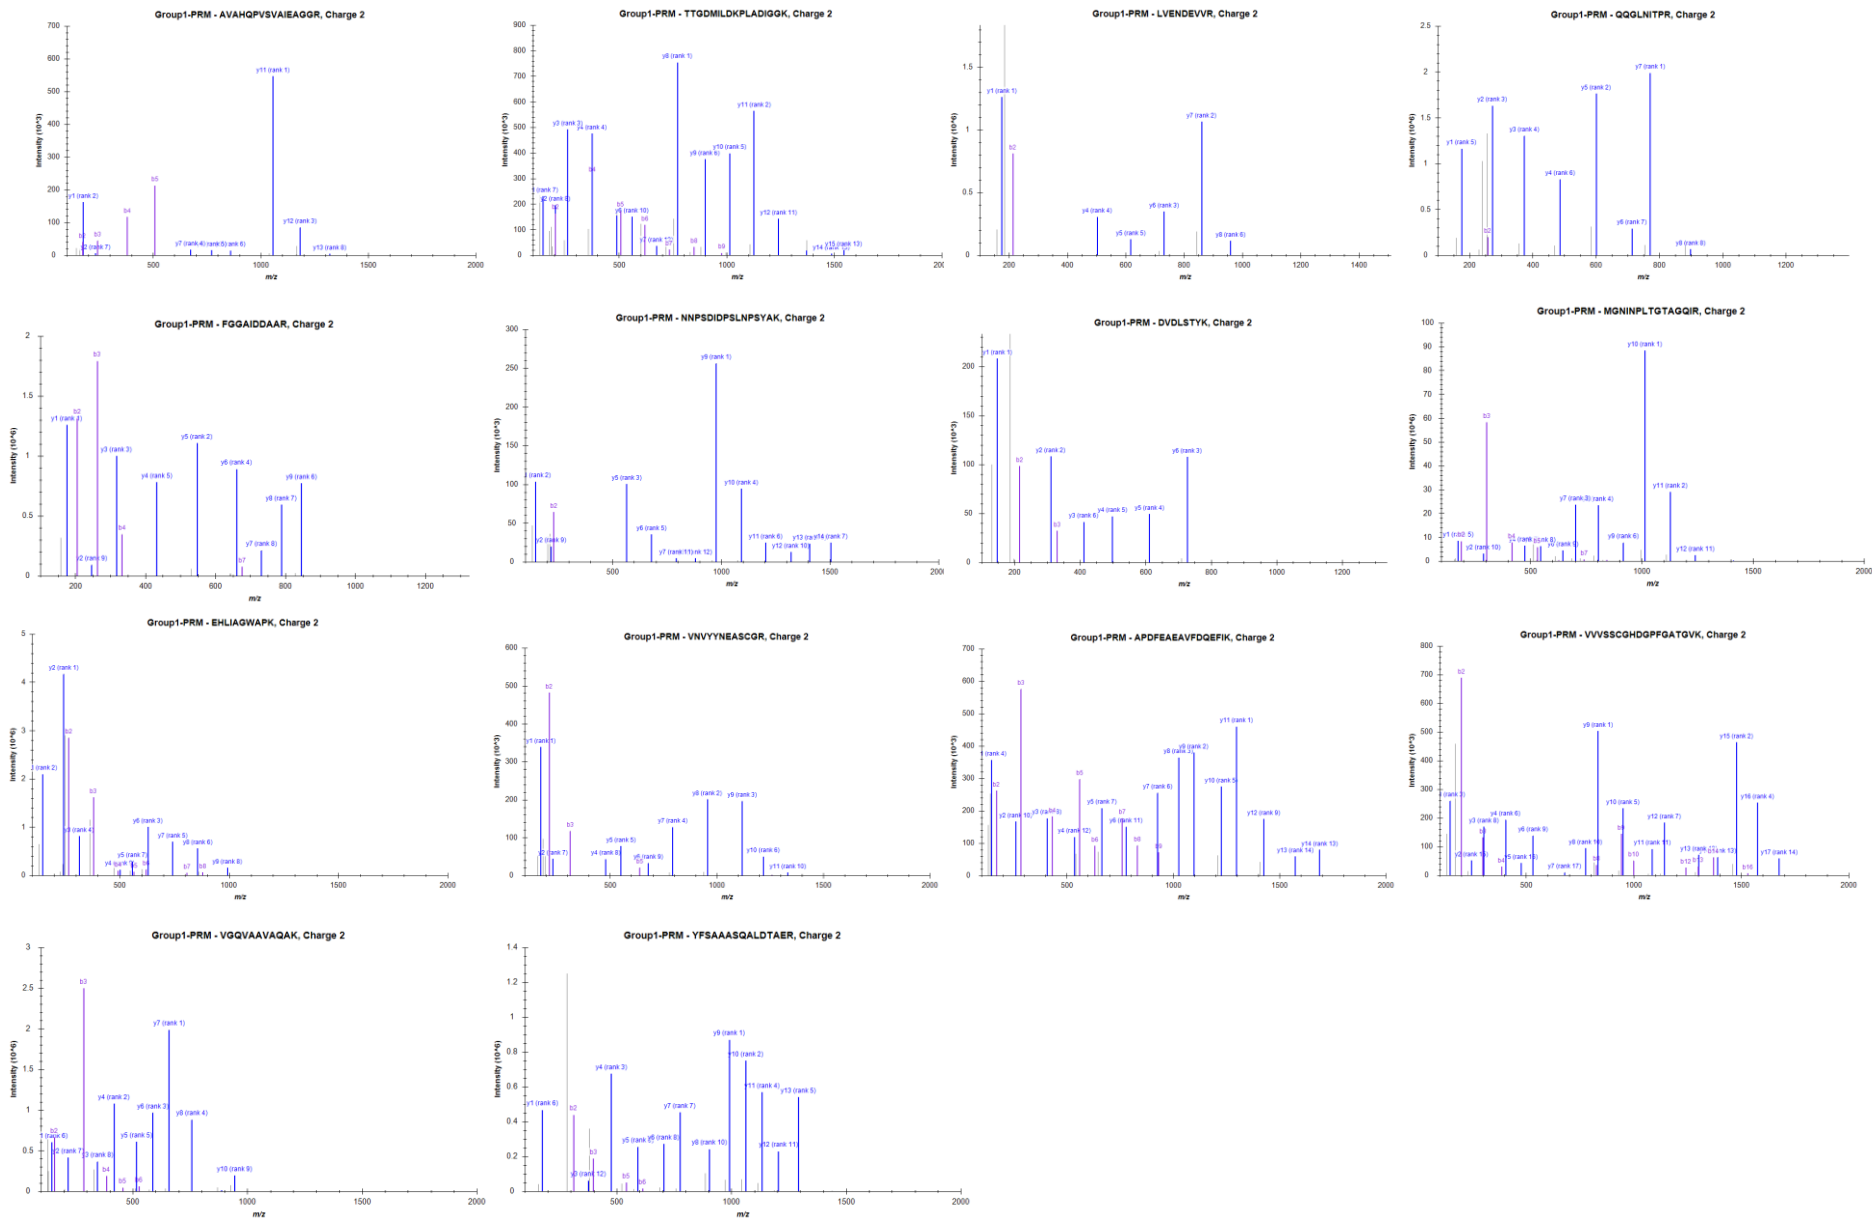

Figure S1. Secondary spectrum of candidate peptides

Supplement: s1 [file s1]
